# Supplementary material
Source: PubMed Central journal article supplement (PMC6367181)
Supplement: rspb20182314supp1.pdf [file rspb20182314supp1.pdf]

**Supplementary Information**

**Contents**

|                                                |       |
|------------------------------------------------|-------|
| Supplementary Figures                          | 2-3   |
| Table 1: Summary Table of Important Characters | 4-17  |
| Complete Phylogenetic Results                  | 18-19 |
| Modifications to Phylogenetic Character Matrix | 20-23 |
| Table 2: List of Specimens with Soft Tissues   | 24-28 |
| Supplementary References                       | 29-30 |



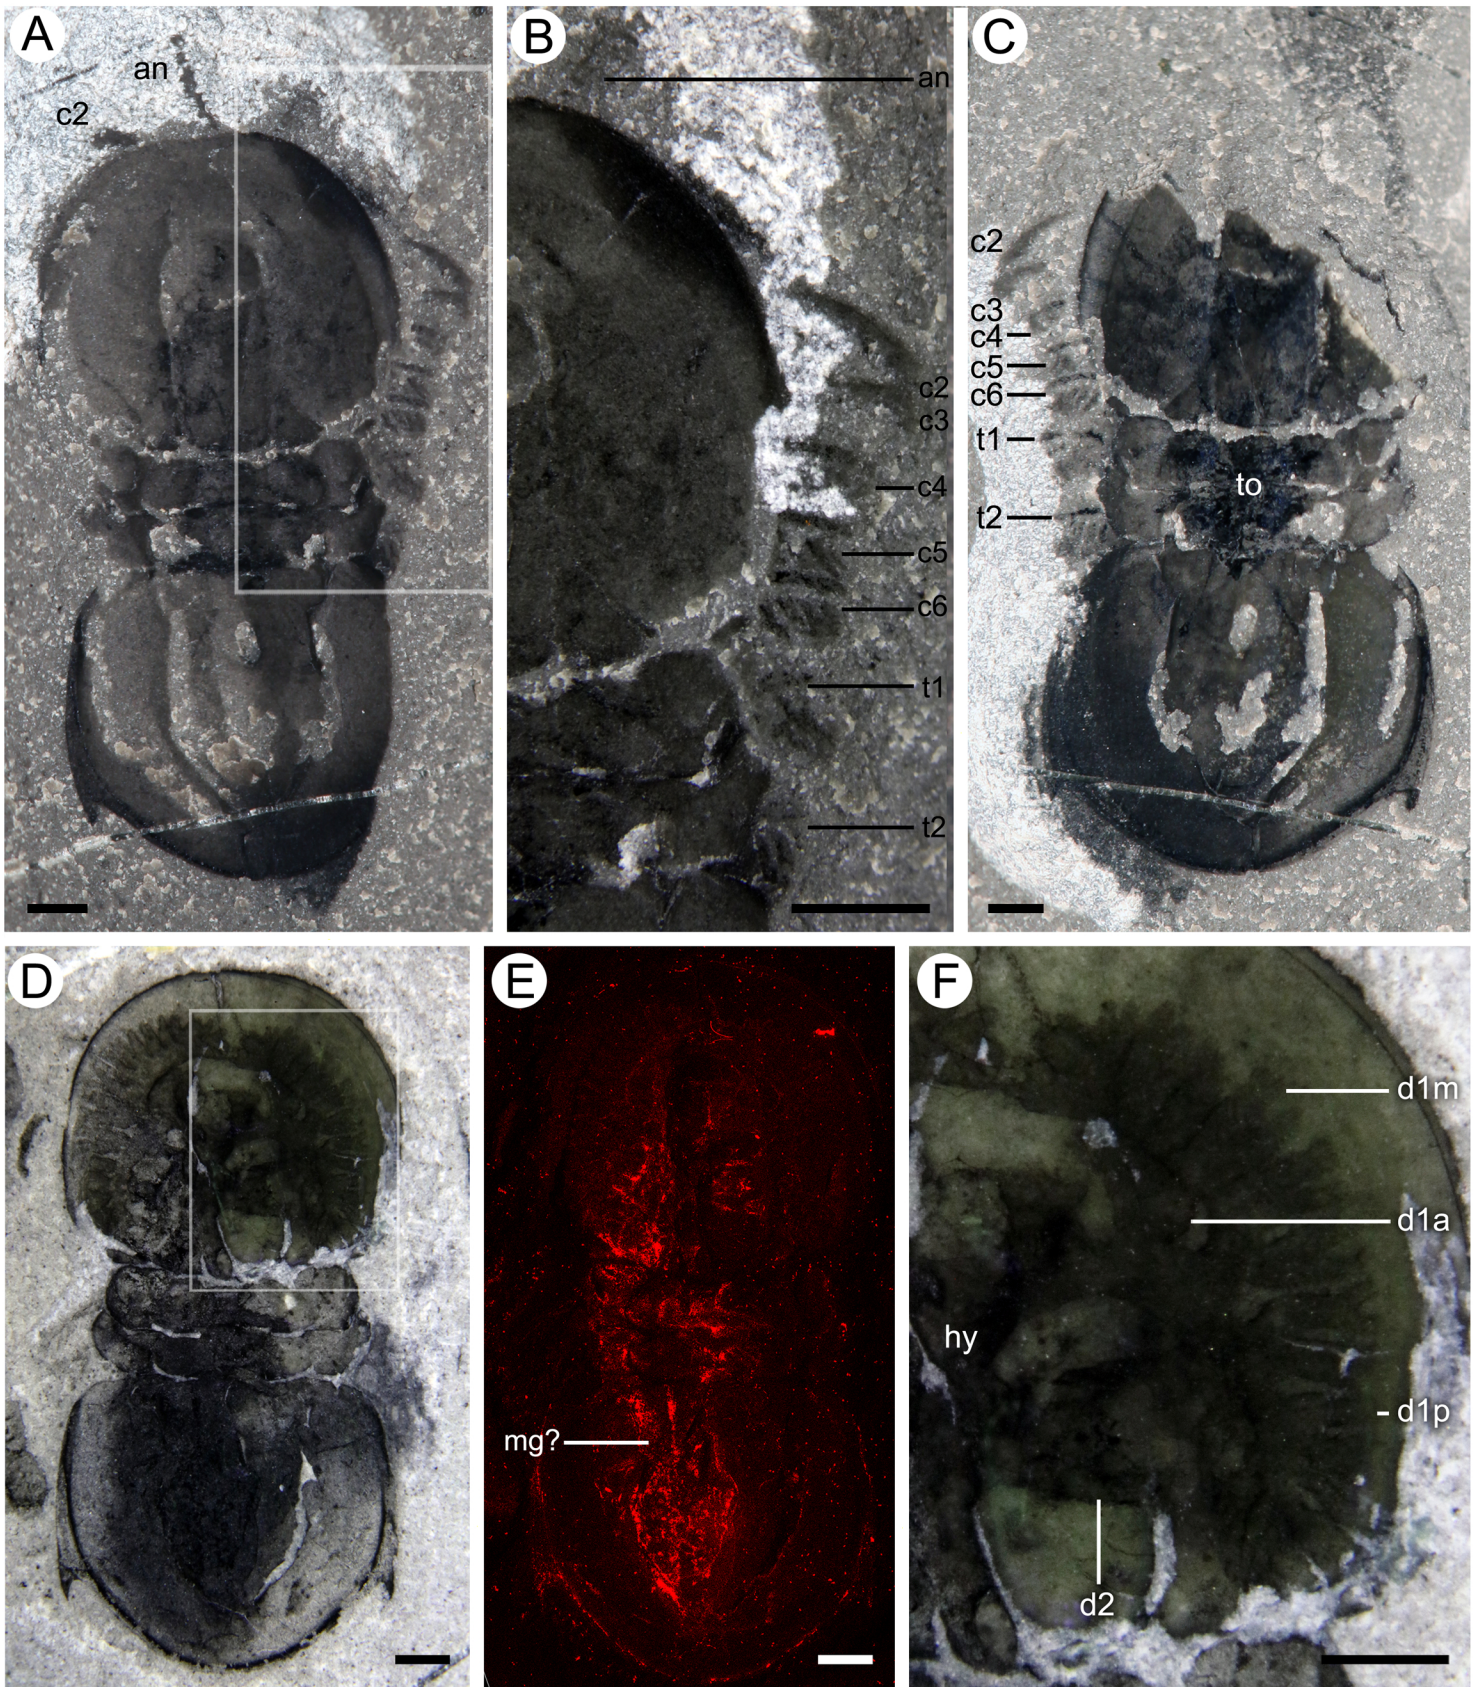

**Supplementary Figure 1 | Additional photos of *Peronopsis* specimens figured in main figures.** **A,B,C**, *Pe. cf. columbiensis*, ROMIP 64990 from MC, dry; **A**, counterpart, boxed area corresponds to **B**; **B**, closeup showing cephalic and trunk appendages; **C**, part, showing whole specimen; **D,E,F**, *Pe. cf. columbiensis* ROMIP 64982 from MC; **D**, whole specimen, underwater, boxed area corresponds to **F**; **E**, whole specimen carbon map, showing probable midgut/hindgut and faintly carbonaceous cephalic diverticulae; **F**, Closeup of cephalic diverticulae, underwater. Bars = 1mm. See Figs. 1 and 2 for abbreviations.



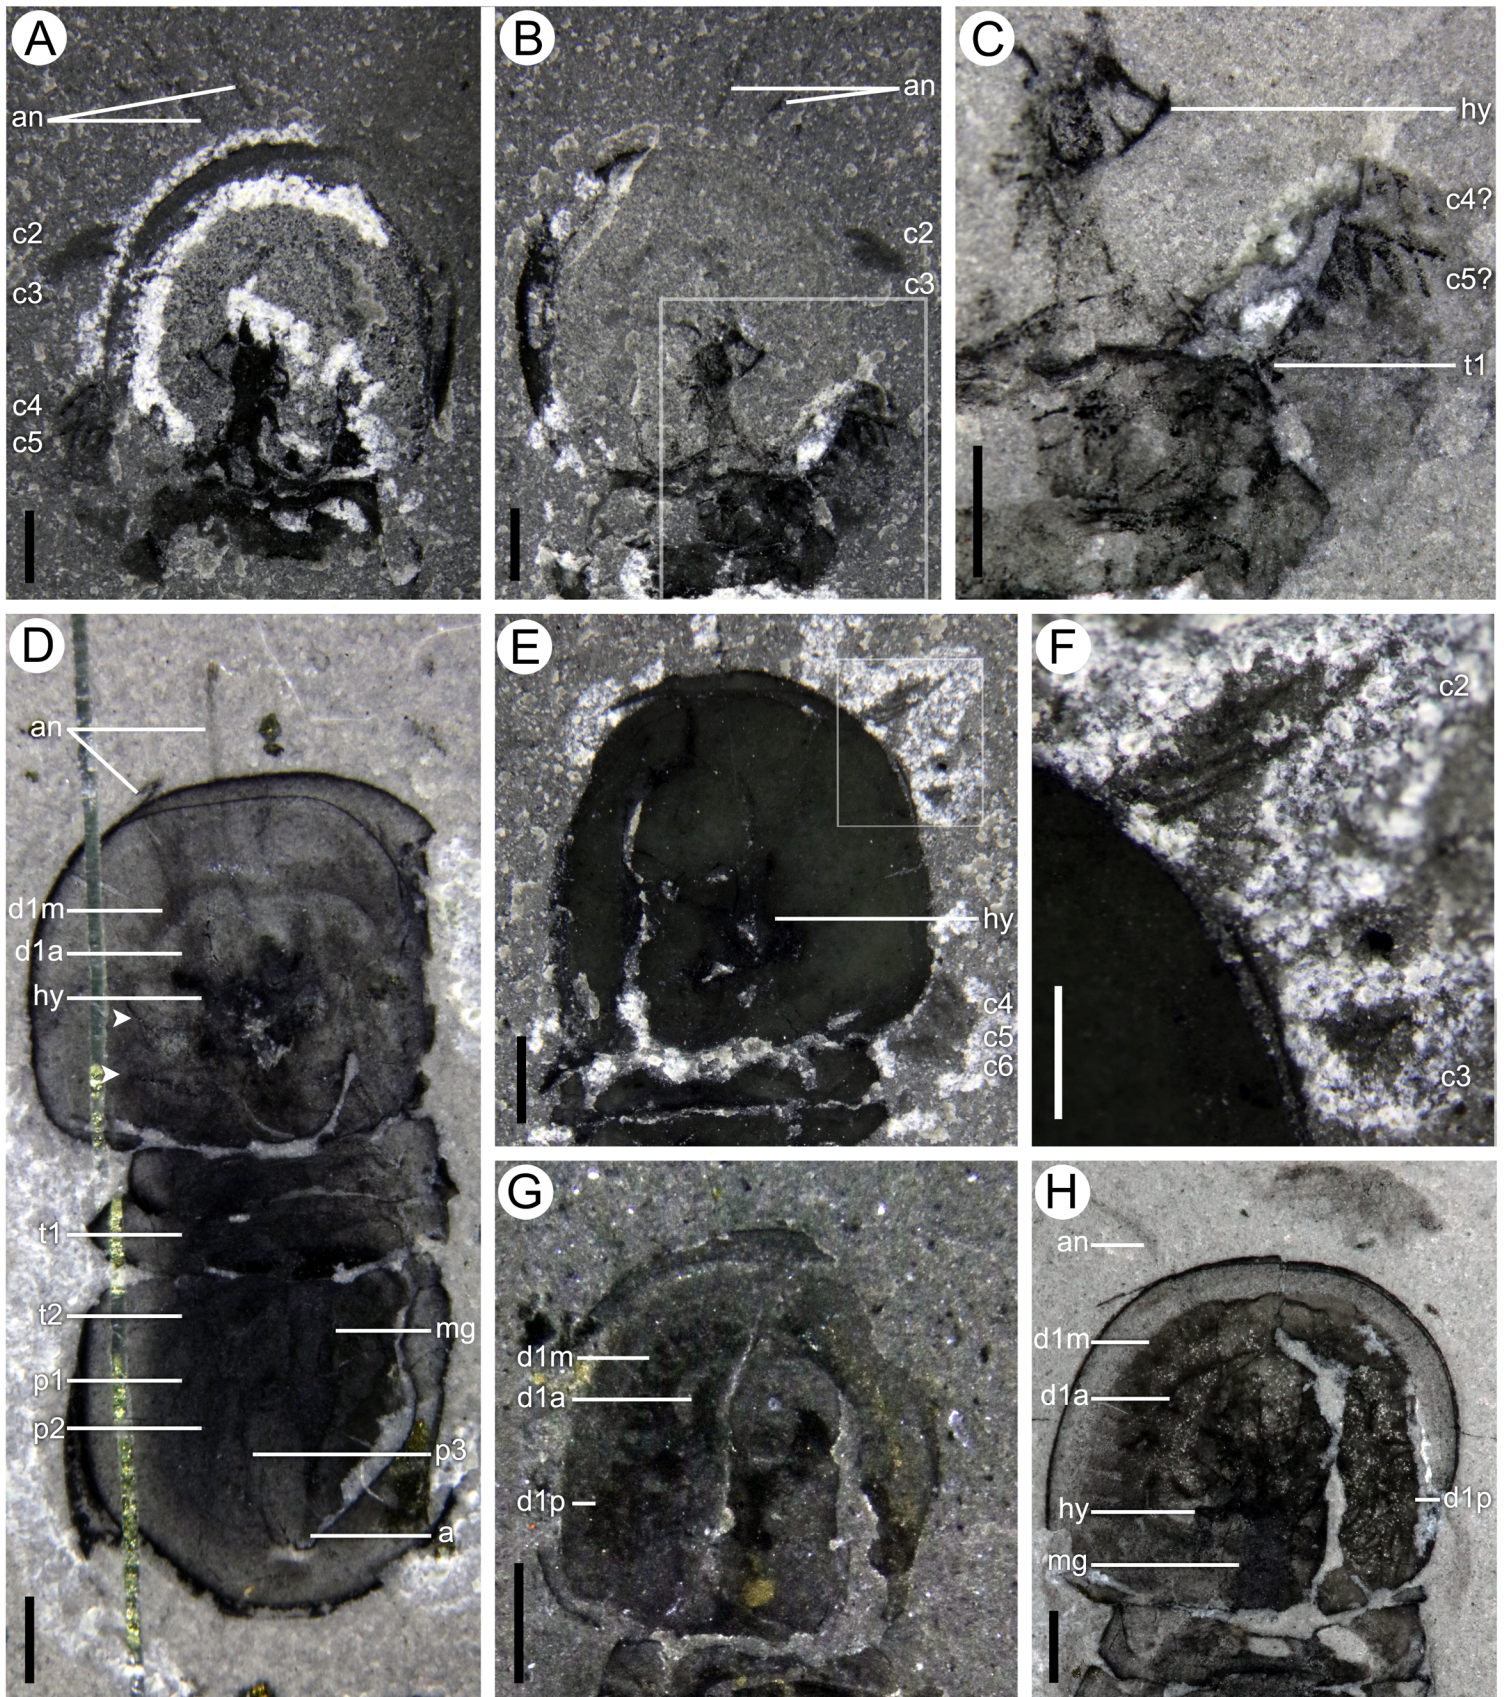

**Supplementary Figure 2 | Additional specimens of *Ptychagnostus* and *Peronopsis*.** **A-C**, *Pe. cf. columbiensis*, ROMIP 64986; **A**, part, dry; **B**, counterpart, dry, boxed area corresponds to **C**; **C**, closeup showing appendages, underwater; **D**, *Pe. cf. columbiensis*, ROMIP 62941 from MC, underwater, arrows indicating cephalic appendages (unknown number); **E,F**, *Pt. cf. praecurrens*, ROMIP 65010 from MC, dry; **E**, cephalon, boxed area corresponds to **F**; **F**, closeup of cephalic appendages 2 and 3 showing setae; **G**, *Pt. praecurrens*, ROMIP 65027 from WQ, underwater, showing d1; **H**, *Pe. cf. columbiensis*, ROMIP 64996 from MC, underwater, with well preserved d1p. Bars: A-E,G,H = 1mm; F = 0.5mm. See Figs. 1 and 2 for abbreviations.



**Supplementary Table 1:** Summary table of characters important to the agnostid problem. Proposed homologies are listed with their references, as well as any counterarguments that have been raised. The far right column lists the treatment of these homologies in this study.

| <u>Section</u>    | <u>Character</u>                                        | <u>Potential homologues found in</u>                                                                                                                                 | <u>Reference</u>                                                                                                                                                                              | <u>Counterargument</u>                                                                            | <u>Reference</u>                           | <u>In this study</u>                                                                                                                                                                                                                                                                                                                           |
|-------------------|---------------------------------------------------------|----------------------------------------------------------------------------------------------------------------------------------------------------------------------|-----------------------------------------------------------------------------------------------------------------------------------------------------------------------------------------------|---------------------------------------------------------------------------------------------------|--------------------------------------------|------------------------------------------------------------------------------------------------------------------------------------------------------------------------------------------------------------------------------------------------------------------------------------------------------------------------------------------------|
| <b>Appendages</b> | short "feeding" antennule, rather than antenniform      | Crustacean larvae + Orsten "stem-crustaceans" ( <i>Oelandocaris</i> ; <i>Martinssonina</i> , <i>Cambropachycope</i> , <i>Goticaris</i> , <i>Henningsmoenicaris</i> ) | Müller & Walossek, 1987; Walossek & Müller, 1990; Stein et al. 2005; Bergström & Hou, 2005; Stein et al. 2013 (excluded <i>Agnostus</i> from lamellipedia because of few antennule podomeres) |                                                                                                   |                                            | <i>Peronopsis</i> and <i>Ptychagnostus</i> have long, antenniform antennules in contrast to those reconstructed for <i>Agnostus</i> . This variation may be taphonomic, as the antennules of <i>Agnostus</i> are broken in known specimens, or it may represent a real biological difference. We have recoded <i>Agnostus</i> as ? for ch. 79. |
| <b>Appendages</b> | antennule podomeres armed with mediodistal setae/spines | "stem-crustacea" (e.g. <i>Henningsmoenicaris</i> , <i>Oelandocaris</i> )                                                                                             | Stein et al. 2005; Stein et al. 2013                                                                                                                                                          | small spines also present on antennules of <i>Marrella</i> , some artiopodans like <i>Kuamaia</i> | Bergström & Hou, 2005; Babcock et al. 2017 | Considered in ch. 225.                                                                                                                                                                                                                                                                                                                         |



|                   |                                                                                                 |                                                 |                                                                                              |                                                                                                                                                                                                                           |                                                                           |                                                                                                                                                                                    |
|-------------------|-------------------------------------------------------------------------------------------------|-------------------------------------------------|----------------------------------------------------------------------------------------------|---------------------------------------------------------------------------------------------------------------------------------------------------------------------------------------------------------------------------|---------------------------------------------------------------------------|------------------------------------------------------------------------------------------------------------------------------------------------------------------------------------|
|                   |                                                                                                 |                                                 |                                                                                              |                                                                                                                                                                                                                           |                                                                           |                                                                                                                                                                                    |
| <b>Appendages</b> | pendant limbs                                                                                   | crustacea, megacheirans, but not artiopodans    | Müller & Walossek, 1987; Bergström, 1992; Bergström & Hou, 2005                              | 1) the limbs of some artiopodans were also situated in 'pendant' position; 2) some trilobitomorph limbs may have rotated during ontogeny; 3) limb stance is partly a product of taphonomy and is not a reliable character | 1) Haug & Haug, 2016; 2) Stein et al. 2013; 3) Edgecombe & Ramsköld, 1999 | Given counterargument 3, we refrain from using this character.                                                                                                                     |
| <b>Appendages</b> | fusion of the proximal podomeres on the endopod and exopod (behind post-antennular limb pair 3) | <i>Henningsmoenicaris</i> , <i>Oelandocaris</i> | Müller & Walossek, 1987; Walossek & Müller, 1990; Stein et al. 2005                          | also likely found in <i>Emeraldella</i> and possibly other artiopodans                                                                                                                                                    | Stein & Selden, 2012                                                      | The proximal limbs of many fossil taxa are poorly known, and the true phylogenetic distribution of this character remains to be established. We do not include it in our analysis. |
| <b>Appendages</b> | reduction of cephalic endopods                                                                  | mandibulates, marrellomorphs                    | Müller & Walossek, 1987; Boxshall, 2004; Stein et al. 2013, Aria & Caron, 2017T <sup>1</sup> | 6-segmented endopod also present on first post-antennular limb of <i>Emeraldella</i>                                                                                                                                      | Stein & Selden, 2012                                                      | Considered in ch. 85-6.                                                                                                                                                            |

<sup>1</sup> T = *Tokummia*, ref. 46 in main manuscript



|                   |                                                                                                                                                              |                                                                                                 |                                                                                                                                                                                |                                                                                                                                                                 |                                                                                            |                                 |
|-------------------|--------------------------------------------------------------------------------------------------------------------------------------------------------------|-------------------------------------------------------------------------------------------------|--------------------------------------------------------------------------------------------------------------------------------------------------------------------------------|-----------------------------------------------------------------------------------------------------------------------------------------------------------------|--------------------------------------------------------------------------------------------|---------------------------------|
| <b>Appendages</b> | slender spines at tip of endopod, as opposed to 'claws' of trilobites                                                                                        | "stem-crustacea" (e.g. <i>Henningsmoenicaris</i> , <i>Oelandocaris</i> , <i>Martinssonina</i> ) | Walossek & Müller, 1990; Bergström & Hou, 2005                                                                                                                                 |                                                                                                                                                                 |                                                                                            | Considered in ch. 205.          |
| <b>Appendages</b> | proximal endopod podomeres 1-4 (or 5) bearing paired, mediodistal spines/endites                                                                             | "stem-crustacea" ( <i>Henningsmoenicaris</i> , <i>Oelandocaris</i> ); some artiopodans          | Müller & Walossek, 1987 (5); Stein et al. 2013 (4); Bergström & Hou, 2005                                                                                                      | also found in <i>Tokummia</i> , <i>Canadaspis</i> , <i>Sidneyia</i> , leanchoiliids, walking legs of some eurypterids                                           | Aria & Caron, 2017T                                                                        | Considered in ch. 198, 200-204. |
| <b>Appendages</b> | first two post-antennular limbs differentiated; multisegmented exopods bearing mediodistal or a pair of lateral setae; few-segmented on more posterior limbs | <i>Oelandocaris</i> , many crustaceans                                                          | Müller & Walossek, 1987; Boxshall, 2004; Stein et al. 2005; Bergström & Hou, 2005; Stein, 2008; Haug et al. 2010; Stein & Selden, 2012; Stein et al. 2013; Babcock et al. 2017 | multisegmented cephalic exopods also present outside of crustacea, e.g. marrellomorphs, habeliids (though lacking setae), <i>Offacolus</i> , <i>Dibasterium</i> | Sutton et al. 2002; Briggs et al. 2012; Haug et al. 2012; Aria & Caron, 2017H <sup>2</sup> | Considered in ch. 104, 106.     |

<sup>2</sup> H = *Habelia*, ref. 44 in main manuscript



|                   |                                                        |                                                                          |                                                                                           |  |  |                                                                                                                                                                                                                                                                                           |
|-------------------|--------------------------------------------------------|--------------------------------------------------------------------------|-------------------------------------------------------------------------------------------|--|--|-------------------------------------------------------------------------------------------------------------------------------------------------------------------------------------------------------------------------------------------------------------------------------------------|
| <b>Appendages</b> | exopods subdivided into proximal and distal lobes      | many artiopodans; modified to different states in e.g. <i>Triarthrus</i> | Edgecombe & Ramsköld, 1999 (though not mentioned for <i>Agnostus</i> ); Stein et al. 2013 |  |  | Considered in ch. 188. It is not possible to assess whether the highly reduced exopods of <i>Agnostus</i> are subdivided in the same way as those of many artiopodans, so we remain ambiguous in our coding.                                                                              |
| <b>Appendages</b> | exopod paddle shaped                                   | <i>Henningsmoenicaris</i> , <i>Oelandocaris</i>                          | Haug et al. 2010                                                                          |  |  | The trunk exopods of <i>Agnostus</i> are highly reduced and are rather unlike the bona fide lobate exopods found in taxa like <i>Oelandocaris</i> , leancholiids, habeliids and some artiopodans. We do not consider this a valid homology.                                               |
| <b>Appendages</b> | exopod setae directed laterally (rather than medially) | non-crustaceans                                                          | Bergström & Hou, 2005                                                                     |  |  | The orientation of exopod setae is highly variable, with a number of taxa (e.g. <i>Oelandocaris</i> , Stein et al. 2008; <i>Skara</i> , Haug et al. 2010b; <i>Emeraldella</i> , Stein & Selden, 2012) bearing both laterally and medially directed setae on different appendages. As such |



|                   |                                    |                           |                                                                         |  |  |                                                                                                                                                                                                                                                                                                                                                                                                                                                                                                                                                                                       |
|-------------------|------------------------------------|---------------------------|-------------------------------------------------------------------------|--|--|---------------------------------------------------------------------------------------------------------------------------------------------------------------------------------------------------------------------------------------------------------------------------------------------------------------------------------------------------------------------------------------------------------------------------------------------------------------------------------------------------------------------------------------------------------------------------------------|
|                   |                                    |                           |                                                                         |  |  | we have chosen not to treat this character here.                                                                                                                                                                                                                                                                                                                                                                                                                                                                                                                                      |
| <b>Appendages</b> | "soft" pennaceous setae on exopods | <i>Henningsmoenicaris</i> | Müller & Walossek, 1987; Walossek & Müller, 1990; Bergström & Hou, 2005 |  |  | The similarity of the 'soft' setae of <i>Henningsmoenicaris</i> (figured in Haug et al. 2010) with the much longer pennaceous setae seen in <i>Agnostus</i> has been overstated. <i>Agnostus</i> ' setae do resemble those of some crustaceans (branchiopods, ostracods, etc.; Martin et al. 2014). However, the setae of <i>Agnostus</i> could alternatively represent early developmental stage lamellae. Lamellae of some artiopodans (e.g. <i>Emeraldella</i> ; Stein & Selden, 2012) are likewise adorned with marginal setules. We do not include this character in our matrix. |

|                        |                                                          |                                                                                                               |                                                                                           |                                                                                                                                                                                                                                     |                                                    |                                                                                                                                                                                                                                                                                                                                     |
|------------------------|----------------------------------------------------------|---------------------------------------------------------------------------------------------------------------|-------------------------------------------------------------------------------------------|-------------------------------------------------------------------------------------------------------------------------------------------------------------------------------------------------------------------------------------|----------------------------------------------------|-------------------------------------------------------------------------------------------------------------------------------------------------------------------------------------------------------------------------------------------------------------------------------------------------------------------------------------|
| <b>Appendages</b>      | setae with rounded cross section, as opposed to lamellae | non-'lamellipedian' arthropods                                                                                | Müller & Walossek, 1987; Walossek & Müller, 1990; Bergström, 1992; Bergström & Hou, 2005  |                                                                                                                                                                                                                                     |                                                    | Considered in ch. 184. Both lamellae and rounded setae seem to have a wide yet discontinuous phylogenetic distribution, being found among panchelicerates, artiopodans, megacheirans, mandibulates, etc. In addition, some taxa seem to possess both types of setal ornamentation (e.g. <i>Emeraldella</i> ; Stein & Selden, 2012). |
| <b>Digestive Tract</b> | genal caecae (ramifying gut diverticulae)                | some trilobites?, <i>Burgessia</i> , <i>Naraoia</i> , <i>Notchia</i> , xiphosurans, several crustacean clades | Öpik, 1959; Jell, 1978; Vannier & Chen, 2002; Cotton & Fortey, 2005; Lerosey-Aubril, 2015 | trilobite genal caecae anastomose, have much smaller diameter than those of agnostinids, and may emerge from several attachment sites in the cephalon; they are probably non-homologous with the digestive structures of other taxa | Bergström, 1973; Jell, 1978; Bergström & Hou, 2005 | Considered in ch. 142, 143, 220, and discussion. Agnostinids and naraoiids share diverticulae originating from the hypostome complex.                                                                                                                                                                                               |



|                  |                                                    |                                         |                                                     |                                                                                                                                                                                                                                                                                                                                                                                                    |                                                                                                             |                                                                                                                                                                                                                                                                                                                                                                                                                                                                                                                                         |
|------------------|----------------------------------------------------|-----------------------------------------|-----------------------------------------------------|----------------------------------------------------------------------------------------------------------------------------------------------------------------------------------------------------------------------------------------------------------------------------------------------------------------------------------------------------------------------------------------------------|-------------------------------------------------------------------------------------------------------------|-----------------------------------------------------------------------------------------------------------------------------------------------------------------------------------------------------------------------------------------------------------------------------------------------------------------------------------------------------------------------------------------------------------------------------------------------------------------------------------------------------------------------------------------|
| <b>Hypostome</b> | natant hypostome                                   | eodiscinids, many polymeroid trilobites | Robison 1972; Fortey & Theron, 1994; Shergold, 2008 | 1) also found in <i>Henningsmoenicaris</i> ; 2) eodiscinid ontogeny begins with conterminant hypostome                                                                                                                                                                                                                                                                                             | 1) Walossek & Müller, 1990; 2) Cederstrom et al. 2009                                                       | Considered in ch. 62.                                                                                                                                                                                                                                                                                                                                                                                                                                                                                                                   |
| <b>Hypostome</b> | hypostome fenestrules covered by membranous fields | <i>Henningsmoenicaris</i>               | Walossek & Müller, 1990                             | 1) could be homologous with 'sensory pits' (maculae) on trilobite hypostome and with similar structures in some artiopodans (e.g. xandarellids; Hou & Bergström, 1997), and potentially with the ventral eyes of <i>Limulus</i> ; 2) could be related to the development of the labrum from paired appendages, homologous with similar structures in artiopodans, habelliids and some mandibulates | 1) Jell, 1975; Müller & Walossek, 1987; Zhang et al. 2007; Ortega-Hernández, 2016; 2) Aria & Caron, 2017T+H | While their functional identity (sensory or otherwise) remains unclear, we consider the homology of bilobed labral protrusions across a range of euarthropods to be possible and follow the coding of Vannier et al., 2018 (ch. 72), with the exception of recoding hymenocarines as ? until more definitive evidence for the bilobed nature of the anteroventral protrusion can be provided. The equivalence of trilobite maculae to bilobed labral protrusions in other taxa is less clear, and we do not assume their homology here. |

|                  |                                               |                                                                                     |                                                     |                                                                                                                                                                                                                                            |                                                                                               |                                                                                                         |
|------------------|-----------------------------------------------|-------------------------------------------------------------------------------------|-----------------------------------------------------|--------------------------------------------------------------------------------------------------------------------------------------------------------------------------------------------------------------------------------------------|-----------------------------------------------------------------------------------------------|---------------------------------------------------------------------------------------------------------|
| <b>Hypostome</b> | membrane lateral to mouth putatively a labrum | "labrophoran" crustaceans                                                           | Walossek et al. 2007                                | 1) hypostome-labrum complex is a symplesiomorphic for Euarthropods, as it is also found in putative upper stem group lineages; 2) 'hypostome' of Orsten taxa, including <i>Agnostus</i> is non-homologous with the lamellipedian hypostome | 1) Ortega-Hernández, 2016; 2) Bergström & Hou, 2005                                           | Considered in ch. 57.                                                                                   |
| <b>Ontogeny</b>  | lack of a (trilobite-like) protaspid stage    | non-trilobites                                                                      | Fortey & Theron, 1994; Hughes, 2006; Shergold, 2008 | 1) This character is also not present in olenelline trilobites, and therefore may not be ancestral for Trilobita; Qian (1982) described putative agnostinid protaspids, but this has been questioned - see 2)                              | 1) Walossek & Müller, 1990; 2) Naimark, 2007                                                  | The absence of ontogenetic data for many taxa in our matrix, precludes the inclusion of this character. |
| <b>Sensory</b>   | simple ventral eyes (?)                       | <i>Oelandocaris</i> ; <i>Henningsmoenicaris</i> , <i>Skara</i> , other Orsten taxa? | Stein et al. 2005; Stein et al. 2008                | 'lateral frontal organs' are also widespread among euarthropods; their identity as median eyes is controversial                                                                                                                            | Edgecombe & Ramsköld, 1999; Cotton & Braddy 2004; Ortega-Hernández, 2015; Aria & Caron, 2017T | Considered in ch. 19.                                                                                   |



|                 |                                                                                |                                                                                                      |                                                                                             |                                                                                                                                                                                                |                                                                                      |                                                                                                                                                                                                                                  |
|-----------------|--------------------------------------------------------------------------------|------------------------------------------------------------------------------------------------------|---------------------------------------------------------------------------------------------|------------------------------------------------------------------------------------------------------------------------------------------------------------------------------------------------|--------------------------------------------------------------------------------------|----------------------------------------------------------------------------------------------------------------------------------------------------------------------------------------------------------------------------------|
| <b>Sensory</b>  | lack of dorsal eyes embedded in tergal shield                                  | most crustaceans, megacheirans, some arthropods, habeliids, etc.                                     | Bergström, 1992                                                                             | 1) 'blindness' is an autapomorphy of agnostinids; 2) <i>Oculagnostus</i> has palpebral lobes; but, 3) the palpebral lobes of <i>Oculagnostus</i> have been argued to be muscle insertion scars | 1) Fortey & Theron, 1994; Cotton & Fortey, 2005; 2) Ahlberg, 1988; 3) Shergold, 2008 | Considered in ch. 26.                                                                                                                                                                                                            |
| <b>Tergites</b> | cuticle mineralization                                                         | trilobites, aglaspids, <i>Phyotphilaspis?</i> , but also widespread amongst other euarthropod groups | Fortey & Theron, 1994; Edgecombe & Ramsköld, 1999; Cotton & Fortey, 2005; Stein et al. 2013 |                                                                                                                                                                                                |                                                                                      | Considered in ch. 4. Given a lack of clarity over whether many extinct taxa mineralized their cuticles primarily with calcium carbonate or phosphate, we eliminated ch. 5 from the Vannier et al. (2018) matrix in our analysis. |
| <b>Tergites</b> | trilobite-like articulation of tergites (as opposed to simple tergite overlap) | trilobites                                                                                           | Fortey & Theron, 1994; Cotton & Fortey, 2005                                                | "edge to edge" articulation with articulating half rings and flanges also present in <i>Kwanyinaspis</i> , <i>Siriocaris</i> , trilobitomorphs, basally branching euchelicerates               | Edgecombe & Ramsköld, 1999; Stein et al. 2013; Lamsdell, 2013                        | Considered in ch. 40, 162, 163.                                                                                                                                                                                                  |

|                 |                                                                                                                           |                                                                             |                                                                 |                                                                                                             |                                                                   |                                                                                                                                                                                                           |
|-----------------|---------------------------------------------------------------------------------------------------------------------------|-----------------------------------------------------------------------------|-----------------------------------------------------------------|-------------------------------------------------------------------------------------------------------------|-------------------------------------------------------------------|-----------------------------------------------------------------------------------------------------------------------------------------------------------------------------------------------------------|
| <b>Tergites</b> | trilobation                                                                                                               | trilobites, some other artiopodans (e.g. <i>Phytophilaspis</i> , emucarids) | Fortey & Theron, 1994; Cotton & Fortey, 2005; Stein et al. 2013 | also found in a range of other arthropods (e.g. some chelicerates, fuxianhuiids, malacostracan crustaceans) | Stein et al. 2005; Scholtz & Edgecombe, 2005; Aria & Caron, 2017T | Considered in ch. 159.                                                                                                                                                                                    |
| <b>Tergites</b> | pleural furrows                                                                                                           | trilobites                                                                  | Müller & Walossek, 1987                                         |                                                                                                             |                                                                   | Considered in ch. 163.                                                                                                                                                                                    |
| <b>Tergites</b> | tips of anterior pleurae angled backwards; anteriormost thoracic tergite narrower but longer than more posterior tergites | eodiscinids                                                                 | Cotton & Fortey, 2005; Dai & Zhang, 2013                        | narrowing of anterior of trunk relative to head shield also present in naraoiids, some panchelicerates      | Edgecombe & Ramsköld, 1999; Lamsdell, 2013; Mayers et al. 2018    | Considered in ch. 218.                                                                                                                                                                                    |
| <b>Tergites</b> | glabella defined dorsally                                                                                                 | trilobites                                                                  | Fortey & Theron, 1994; Cotton & Fortey, 2005                    |                                                                                                             |                                                                   | Also shared with <i>Phytophilaspis</i> and some aglaspidids. Considered in ch. 41, 159.                                                                                                                   |
| <b>Tergites</b> | cephalic border                                                                                                           | trilobites                                                                  | Fortey & Theron, 1994                                           |                                                                                                             |                                                                   | We do not consider this character in our analysis. We expect it might further support a trilobite + agnostinid clade, though a cephalic border is also variably expressed among other arachnomorphs (e.g. |



|                 |                                                                  |                                                                                          |                                                                                                                      |                                                                                                         |                |                                                                                                                                      |
|-----------------|------------------------------------------------------------------|------------------------------------------------------------------------------------------|----------------------------------------------------------------------------------------------------------------------|---------------------------------------------------------------------------------------------------------|----------------|--------------------------------------------------------------------------------------------------------------------------------------|
|                 |                                                                  |                                                                                          |                                                                                                                      |                                                                                                         |                | xiphosurans, chasmataspids).                                                                                                         |
| <b>Tergites</b> | dorsal expression of last (occipital) segment of cephalic shield | trilobites, <i>Phytophilaspis</i> , <i>Sinoburius</i> , <i>Arthroaspis</i> , xiphosurans | Cotton & Fortey, 2005; Stein et al. 2013; Lamsdell, 2013                                                             |                                                                                                         |                | Considered in ch. 42.                                                                                                                |
| <b>Tergites</b> | genal spines                                                     | trilobites, <i>Phytophilaspis</i> , <i>Sinoburius</i> , some aglaspidids                 | Fortey & Theron, 1994; Cotton & Fortey, 2005; Stein et al. 2013                                                      | has been argued that the 'fulcral spines' of agnostinids are non-homologous with trilobite genal spines | Shergold, 2008 | The genal spines of agnostinids may well be homologous with those of many trilobites and other arachnomorphs. Considered in ch. 223. |
| <b>Tergites</b> | lack of (trilobite-like) facial sutures, submarginal sutures     | non-trilobites                                                                           | Walossek & Müller, 1990; Bergström, 1992; Bergström & Hou, 2005; Cotton & Fortey, 2005; Hughes, 2006; Shergold, 2008 |                                                                                                         |                | Considered in ch. 219.                                                                                                               |
| <b>Tergites</b> | no palpebro-ocular ridges                                        | non-trilobites                                                                           | Fortey & Theron, 1994                                                                                                |                                                                                                         |                | Considered in ch. 27.                                                                                                                |

|                 |                                                                                                 |                                                                         |                                                                                        |                                                                                                                                                                                                      |                                               |                                                                                                                                                                                                                                                                                                                                                   |
|-----------------|-------------------------------------------------------------------------------------------------|-------------------------------------------------------------------------|----------------------------------------------------------------------------------------|------------------------------------------------------------------------------------------------------------------------------------------------------------------------------------------------------|-----------------------------------------------|---------------------------------------------------------------------------------------------------------------------------------------------------------------------------------------------------------------------------------------------------------------------------------------------------------------------------------------------------|
| <b>Tergites</b> | pygidium (newly formed segments fused to next anterior segment, may separate later in ontogeny) | trilobitomorphs, but also <i>Henningsmoenicaris</i> , <i>Retifacies</i> | Fortey & Theron, 1994; Edgecombe & Ramsköld, 1999; Haug et al. 2010; Stein et al. 2013 |                                                                                                                                                                                                      |                                               | Considered in ch. 215. We here consider the tergites covering multiple appendages in xandarellids to be a separate condition, although it may share a developmental basis with the pygidia of other artiopodans.                                                                                                                                  |
| <b>Tergites</b> | posterolateral pygidial spines                                                                  | many pygidium-bearing artiopodans                                       | Shergold, 2008                                                                         | pygidium lacking lateral spines was a putative synapomorphy of a clade including trilobites (with internal reversals) and <i>Phytophilaspis</i> ; but is also found in a number of other artiopodans | Edgecombe & Ramsköld, 1999; Stein et al. 2013 | The effacement of dorsal segmentation in the pygidial shield of agnostinids and many other pygidium-bearing taxa makes it a challenge to assess this proposed homology. We removed ch. 219 from the 2018 Vannier et al. matrix because its vague definition was drawing together taxa whose pygidial ornamentation was unlikely to be homologous. |

|              |                                                                                                                                                                                               |                                                                                                                                  |                                            |                                                                                                                                                                                |                              |                                                                                                                                                                                                                                                                                       |
|--------------|-----------------------------------------------------------------------------------------------------------------------------------------------------------------------------------------------|----------------------------------------------------------------------------------------------------------------------------------|--------------------------------------------|--------------------------------------------------------------------------------------------------------------------------------------------------------------------------------|------------------------------|---------------------------------------------------------------------------------------------------------------------------------------------------------------------------------------------------------------------------------------------------------------------------------------|
| <b>Other</b> | loss/fusion of the tritocerebral sternite (could this be the first step towards the evolution of the sternum of more derived crustacea or the intercalary segment of hexapods and myriapods?) | "labrophoran" crustaceans                                                                                                        | Walossek et al. 2007; Stein & Selden, 2012 | the degree of cephalic sternite fusion is variable among different crustacean groups, questioning the validity of this character as a defining synapomorphy for "labrophorans" | Aria & Caron, 2017T (Ch. 61) | Considered in ch. 65, 66.                                                                                                                                                                                                                                                             |
| <b>Other</b> | mouth situated in atrium oris (depression behind labrum, which bulges from posterior of hypostome)                                                                                            | "labrophoran" crustacea ( <i>Oelandocaris</i> , <i>Martinssonina</i> , <i>Henningsmoenicaris</i> , Phosphatocopina, eucrustacea) | Stein et al. 2005                          |                                                                                                                                                                                |                              | Given that the mouth is situated behind the hypostome-labrum complex in all euarthropods (e.g. Ortega-Hernández, 2016) and considering the lack of mandibles and paragnaths to complete the enclosure of the pre-oral cavity, we consider an atrium oris to be absent in agnostinids. |

|                     |                                                                                     |                    |                                                                             |                                                     |                                                                        |                                                                                                                                                                                                                                                                                                                                                                      |
|---------------------|-------------------------------------------------------------------------------------|--------------------|-----------------------------------------------------------------------------|-----------------------------------------------------|------------------------------------------------------------------------|----------------------------------------------------------------------------------------------------------------------------------------------------------------------------------------------------------------------------------------------------------------------------------------------------------------------------------------------------------------------|
| <p><b>Other</b></p> | <p>offset between tergal and somitic segmentation, 4.5 cephalic appendage pairs</p> | <p>artiopodans</p> | <p>Edgecombe &amp; Ramsköld, 1999; Stein et al. 2005; Stein et al. 2013</p> | <p>tergal offset not present in <i>Agnostus</i></p> | <p>Müller &amp; Walossek, 1987; Ortega-Hernández &amp; Brena, 2012</p> | <p>Whether trilobites and other artiopodans possessed 4 or 4.5 head appendage pairs has long been controversial. The best case for such a tergal offset has been made using specimens of <i>Triarthrus</i> (Ortega-Hernández &amp; Brena, 2012), but its distribution among other artiopodans is less clear. We therefore opt not to include it in our analysis.</p> |
|---------------------|-------------------------------------------------------------------------------------|--------------------|-----------------------------------------------------------------------------|-----------------------------------------------------|------------------------------------------------------------------------|----------------------------------------------------------------------------------------------------------------------------------------------------------------------------------------------------------------------------------------------------------------------------------------------------------------------------------------------------------------------|



**Supplementary Figure 3 (next page) | Complete results of Bayesian time calibrated phylogenetic analysis.** Based on a matrix incorporating 225 characters and 124 taxa (see Vannier et al. 2018 and associated nexus file for further methodological details). Numbers next to nodes denote posterior probabilities. Time scale is in millions of years.

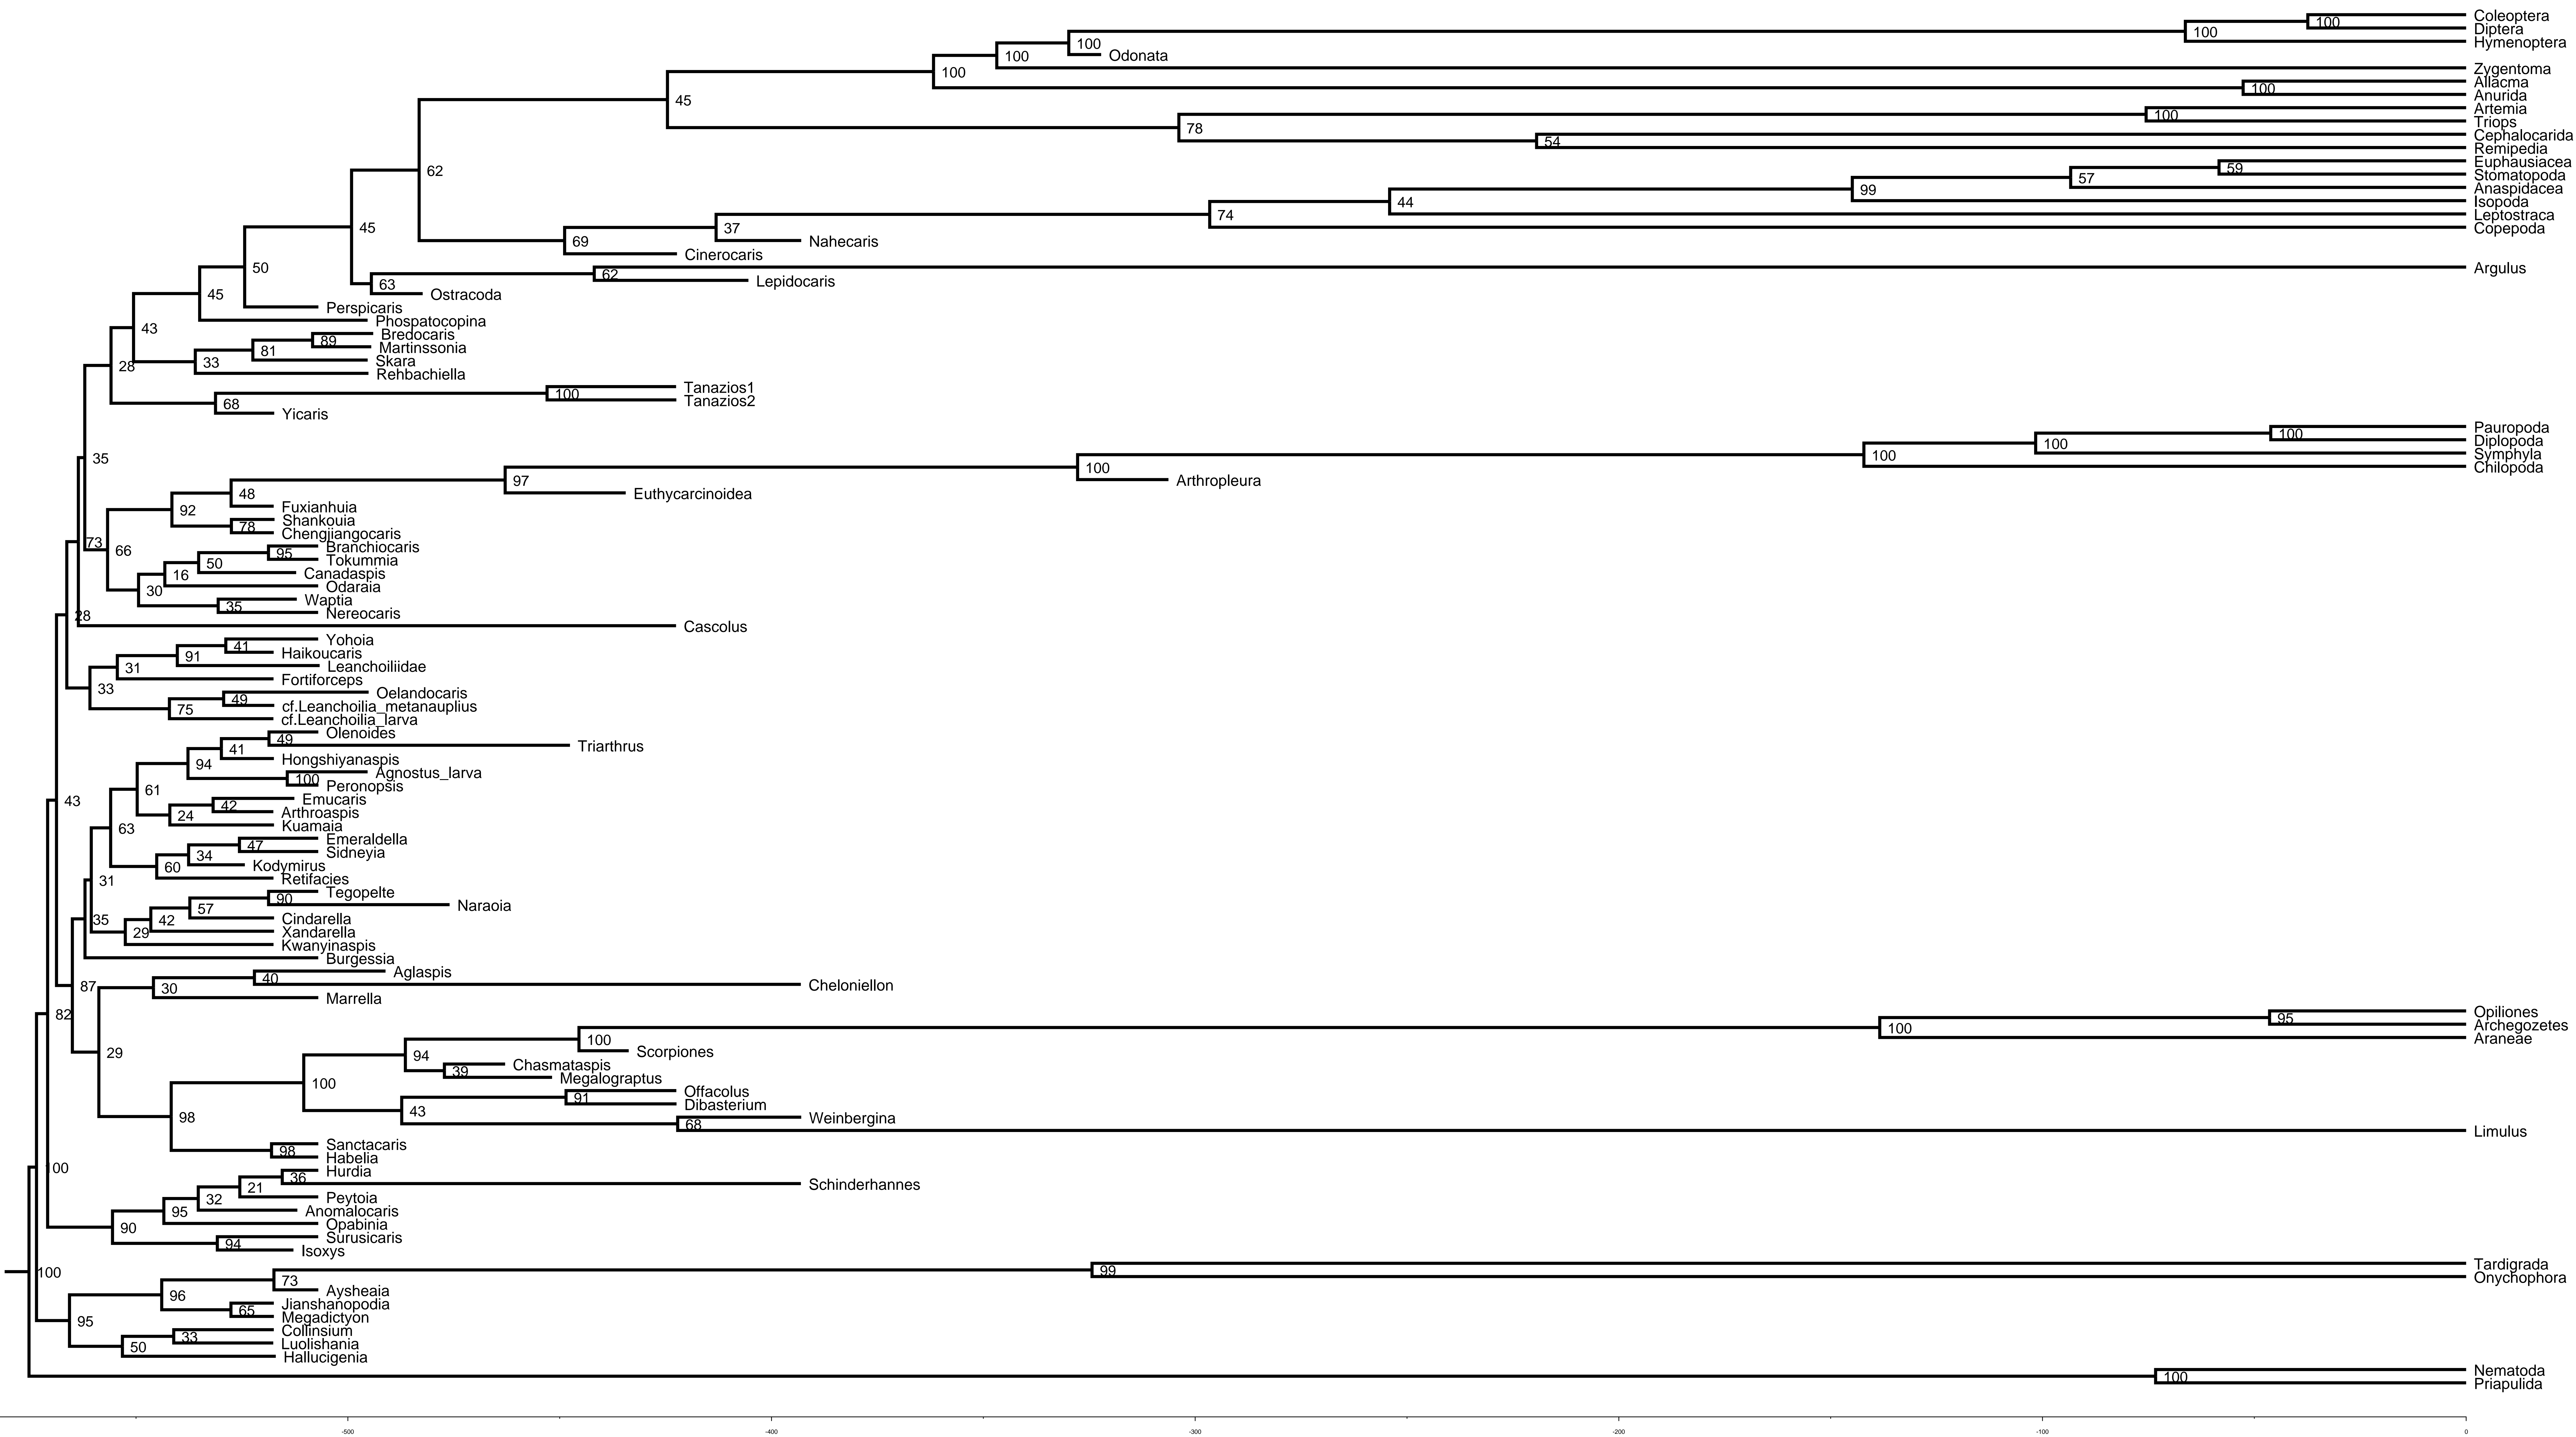

## **Modifications to Phylogenetic Character Matrix**

The various modifications made to the matrix published in Vannier et al. 2018 are listed below.

### **Characters Deleted**

\* Note: numbering given in this section corresponds to that in Vannier et al. (2018). Numbering in our matrix was adjusted given the deletions (i.e. ch. 6 in Vannier et al. 2018 became ch. 5, etc.). Numbering in sections below (Characters Added, Coding Modifications) corresponds to that in our matrix, following these deletions.

Ch. 5 – Given the contention over the original cuticle mineralogy of several extinct groups, we chose to omit this character.

Ch. 219 – The definition of this character was too vague and was drawing together taxa that were unlikely to share homologous pygidial ornamentation.

### **Characters Added**

[218] Trunk tergites taper anteriorly relative to cephalic shield

- 0. Absent
- 1. Present

*Remarks:* See Edgecombe & Ramsköld, 1999 ch.19; Cotton & Braddy, 2004 ch. 39; Paterson et al. 2010 ch. 15; Ortega-Hernández et al. 2013 ch. 49; Mayers et al. 2018 ch. 22. This character is present in agnostids (Cotton & Fortey, 2005), among other taxa. Applicable only for taxa with a cephalic shield and horizontal pleurae.

[219] Visual surface with calcified lenses, bounded by circumocular suture

- 0. Absent
- 1. Present

*Remarks:* See Edgecombe & Ramsköld, 1999 ch. 5; Cotton & Braddy, 2004 ch. 21; Paterson et al. 2010 ch. 4; Ortega-Hernández et al. 2013 ch. 21; Mayers et al. 2018 ch. 9. Applicable for taxa with eyes embedded in the tergal shield.

[220] Main ramified cephalic diverticulae connect to the alimentary canal through the hypostome-labrum complex

- a. Absent
- b. Present

*Remarks:* (new character) While cephalic diverticulae occur among disparate arthropod groups, attachment to the anteriormost section of the alimentary canal through the hypostome-labrum complex seems to be unique to agnostinids and naraoiids.

[221] Segmental impressions in pygidial shield

- 0. Absent/highly effaced
- 1. Strongly developed

*Remarks:* Modified from Paterson et al. 2010 ch. 16; Mayers et al. 2018 ch. 5.

[222] Shape of posteriormost margin of pygidium

- 0. Convex
- 1. Sub-straight to concave

*Remarks:* Ch. 28 Mayers et al. 2018.

[223] Axial spine on preterminal trunk segment

- 0. Absent
- 1. Present

*Remarks:* Modified from Mayers et al. 2018 ch. 31. This character unites xandarellids in our analysis. We did not assume the homology of medially positioned spines fused into effaced pygidia (e.g. in *Naraoia*, *Kuamaia*), though some of these may be homologous.

[224] Genal spines

- 0. Absent
- 1. Present

*Remarks:* There has been some debate as to whether agnostinids have true genal spines (Fortey & Theron, 1994) or ‘fulcral’ spines (Shergold, 2008); however, Cotton & Fortey (2005) provided a compelling argument for the homology of agnostinid spines with other genal spines based on the morphogenesis of these structures. We therefore opt for coding them as potentially homologous to the genal spines of other arthropods. See also e.g. Ortega-Hernández et al. 2013 ch. 21; Mayers et al. ch. 17.

[225] Medial spines or enlarged setae on antennules

- 0. Absent
- 1. Present

*Remarks:* This character is widespread and variously developed among euarthropods.

#### **Taxa Added**

*Peronopsis*, *Triarthrus*, *Hongshiyanaspis*, *Retifacies*, *Cindarella*, *Kodymirus*, *Arthroaspis*, *Tegopelte*, *Kwanyinaspis*, *Emucaris*, *Cheloniellon*

#### **Taxa Removed**

*pycnogonida*, *pycnogonum larva*, *Cambropycnogon*, *Aquilonifer*

Pycnogonids have been highly problematic in previous analyses and in Vannier et al. (2018) formed an unexpected clade with marrellomorphs and *Aquilonifer*. Given that these taxa likely have little relevance to the agnostid problem, we have removed them from our analysis for now.



## Coding Modifications

Ch. 31 (somites in head) – changed to ? for *Agnostus* (coded state 2 for *Peronopsis*), state 3 for *Xandarella* (this assumes that the seventh appendage pair is part of the head tagma, as opposed to lying at the head-trunk boundary), state 1 for *Naraoia*, ? for *Kuamaia*

Ch. 40 (tergal articulation) – changed to state 1 for *Agnostus* and *Peronopsis*, to acknowledge the distinct state from trilobites

Ch. 72 (bipartite ventral protrusion) – recoded as state 1 for *Xandarella*<sup>1</sup>, and as ? for *Tokummia*, *Branchiocaris*, and *Waptia*<sup>2</sup>

Ch. 79 (type of multisegmented frontalmost appendage) – recoded as ? for *Agnostus*

Ch. 90 (endopod of 5<sup>th</sup> appendage pair) – recoded as ? for *Agnostus*

Ch. 92 (repeated appendage morphology) – recoded as ? for *Agnostus*

Ch. 99 (ramification of postantennular appendage) – recoded as state 0 for *Agnostus*, ? for *Aglaspis*<sup>3</sup>

Ch. 104 (postantennular exopod type) – recoded as ? for *Aglaspis*<sup>3</sup>

Ch. 105 (other cephalic exopods) – recoded as ? for *Aglaspis*<sup>3</sup>

Ch. 106 (other cephalic exopod type) – recoded as ? for *Aglaspis*<sup>3</sup>

Ch. 107 (multisetose exopod tip) – recoded as ? for *Aglaspis*<sup>3</sup>

Ch. 108 (detachment of exopods) – recoded as ? for *Aglaspis*<sup>3</sup>

Ch. 124 (5<sup>th</sup> appendage vestigial) – recoded as ? for *Agnostus*

Ch. 125 (palp on 5<sup>th</sup> appendage) – recoded as ? for *Agnostus*

Ch. 156 (tergo-sternal decoupling) – recoded as ? for *Naraoia*<sup>4</sup>

Ch. 165 (proximo-distal differentiation of endopod podomeres) – recoded as 0 for *Marrella*<sup>5</sup>

Ch. 180 (gnathobase) – recoded as state 1 for *Agnostus*

Ch. 194 (exopod subdivision) – recoded as ? for *Agnostus*

Ch. 205 (limb tip) – recoded as state 5 for *Agnostus*<sup>6</sup>

Ch. 207 (telson) – recoded as state 0 for *Xandarella*<sup>7</sup>

Ch. 208 (telson type) – recoded as - for *Xandarella*<sup>7</sup>

Ch. 209 (anus location) – recoded as state 0 for *Xandarella*<sup>7</sup>

<sup>1</sup>Hou & Bergström (1997) illustrated specimens of *Xandarella* that show bulbous protrusions associated with the hypostome complex, similar to that of e.g. naraoiids.

<sup>2</sup>We have coded these taxa as ? until definitive evidence for the bilobed nature of the frontal protrusion can be provided.

<sup>3</sup>We prefer to code the cephalic appendages of *Aglaspis* as questionably biramous/uniramous rather than uniramous given their poor visibility in the single published specimen (Briggs et al. 1979).

<sup>4</sup>The entirely fused and effaced trunk tergal shield makes it impossible to tell if this character is present in naraoiids.

<sup>5</sup>We argue that the stenopodous endopod podomeres of *Marrella* (Whittington, 1971) show no evidence of significant proximo-distal differentiation.

<sup>6</sup>We have recoded this character to better reflect the differentiation between the limb tip of polymeroid trilobites and *Agnostus* (Müller & Walossek, 1987).

<sup>7</sup>The axial spine of xandarellids occurs on a pre-terminal segment and is therefore not a telson (Hou & Bergström, 1997; Ramsköld et al. 1997). It is not clear whether the terminal tergal plate can strictly be considered homologous to the pygidia of other arachnomorphs given the offset between tergal segmentation and appendages in these taxa.

**Supplementary Table 2:** Summary of ROM specimens with soft tissue preservation observed in this study.

| Locality           | Field No. | ROMIP No. | Part/Counter-Part | Strat. Level | Taxon                              | Soft Tissues                                             | Quality | Figured in     | Max. Cephalon Width (mm) | Total Sagittal Length (mm) |
|--------------------|-----------|-----------|-------------------|--------------|------------------------------------|----------------------------------------------------------|---------|----------------|--------------------------|----------------------------|
| Walcott Quarry BW  | 94-415    | 60750     | nc                | -120         | <i>Ptychagnostus praecurrens</i>   | cephalic and trunk limbs                                 | **      |                | 4.3                      | 9                          |
| Marble Canyon MCC1 | 12-194    | 62930     | ab                | -378         | <i>Peronopsis cf. columbiensis</i> | antennules                                               | **      |                | 2.5                      | 5                          |
| Marble Canyon MCC1 | 12-720    | 62941     | c                 | -377         | <i>Peronopsis cf. columbiensis</i> | antennule, trunk limb traces                             | *       | Fig. 2 I,J; SI |                          | 9.9                        |
| Marble Canyon MCC1 | 14-1010   | 64390     | ab                | -405         | <i>Peronopsis cf. columbiensis</i> | faint cephalic diverticulae; cephalic limbs protruding   | **      |                | 6.6                      | 12.6                       |
| Marble Canyon MCC1 | 12-168    | 64976     | a                 | talus        | <i>Peronopsis cf. columbiensis</i> | pygidial limbs; gut, including diverticulae              | ***     |                | 6.5                      | 12.5                       |
| Marble Canyon MCC1 | 12-183    | 64977     | ab                | -378         | <i>Peronopsis cf. columbiensis</i> | gut, including diverticulae                              | **      | SI             | 6.2                      | 12.5                       |
| Marble Canyon MCC1 | 12-530    | 64978     | nc                | -366         | <i>Peronopsis cf. columbiensis</i> | cephalic limbs                                           | **      |                | 5.6                      | 11.1                       |
| Marble Canyon MCC1 | 12-600    | 64979     | a                 | -406         | <i>Peronopsis cf. columbiensis</i> | cephalic limb with clubs; complete gut with diverticulae | ***     | Fig. 1 C       | 5.3                      | 10.4                       |
| Marble Canyon MCC1 | 12-604    | 64980     | b                 | -406         | <i>Peronopsis cf. columbiensis</i> | ?                                                        |         |                |                          |                            |

|                    |         |       |    |       |                                    |                                               |     |                       |     |      |
|--------------------|---------|-------|----|-------|------------------------------------|-----------------------------------------------|-----|-----------------------|-----|------|
| Marble Canyon MCC1 | 12-668  | 64981 | nc | -403  | <i>Peronopsis cf. columbiensis</i> | gut                                           |     |                       | 5.5 | 9.5  |
| Marble Canyon MCC1 | 12-684  | 64982 | b  | -393  | <i>Peronopsis cf. columbiensis</i> | cephalic diverticulae; trunk limbs with clubs | *** | Fig. 1 A; SI          | 5.6 | 12   |
| Marble Canyon MCC1 | 12-762  | 64983 | ab | talus | <i>Peronopsis cf. columbiensis</i> | gut                                           | *   |                       |     |      |
| Marble Canyon MCC1 | 14-1026 | 64984 | ab | -384  | peronopsid                         | gut                                           | *   |                       |     |      |
| Marble Canyon MCC1 | 14-1390 | 64985 | ab | -351  | <i>Peronopsis cf. columbiensis</i> | pygidial limbs?; gut?                         | **  |                       |     |      |
| Marble Canyon MCC1 | 14-1414 | 64986 | ab | -360  | <i>Peronopsis cf. columbiensis</i> | antennule, cephalic limbs, trunk limbs        | *** | Fig. 2 H; SI          | 5.5 | 12.7 |
| Marble Canyon MCC1 | 14-587  | 64987 | nc | -245  | <i>Peronopsis cf. columbiensis</i> | ?; poorly preserved                           |     |                       | 6.7 | 12.4 |
| Marble Canyon MCC1 | 14-724  | 64988 | bc | -383  | <i>Peronopsis cf. columbiensis</i> | gut; cephalic limbs                           |     |                       |     |      |
| Marble Canyon MCC1 | 14-727  | 64989 | nc | -385  | <i>Peronopsis cf. columbiensis</i> | antennules; bases of cephalic limbs           | **  | Fig. 1 B              | 6.3 | 12.7 |
| Marble Canyon MCC1 | 14-735  | 64990 | ab | -383  | <i>Peronopsis cf. columbiensis</i> | limbs; diverticulae; triangular organ?        | *** | Fig. 1 E,F; 2 F,G; SI | 6.4 | 13.2 |
| Marble Canyon MCC1 | 14-736  | 64991 | ab | -385  | <i>Peronopsis cf. columbiensis</i> | bases of cephalic limbs                       | **  |                       |     | 12.1 |



|                    |         |       |    |      |                                    |                                                   |     |            |     |      |
|--------------------|---------|-------|----|------|------------------------------------|---------------------------------------------------|-----|------------|-----|------|
| Marble Canyon MCC1 | 14-757  | 64992 | ab | -388 | <i>Peronopsis cf. columbiensis</i> | posterior gut                                     | **  | SI         |     |      |
| Marble Canyon MCC1 | 14-764  | 64993 | bc | -386 | <i>Peronopsis cf. columbiensis</i> | cephalic limbs                                    | *** | Fig. 2 B-E | 6.8 |      |
| Marble Canyon MCC1 | 14-842  | 64994 | nc | -403 | <i>Peronopsis cf. columbiensis</i> | diverticulae                                      | **  | Fig. 1 D   | 5.6 | 11.5 |
| Marble Canyon MCC1 | 14-847  | 64995 | nc | -408 | <i>Peronopsis cf. columbiensis</i> | limbs?; partial gut                               | *   |            | 3.9 | 6.6  |
| Marble Canyon MCC1 | 14-865  | 64996 | b  | -374 | <i>Peronopsis cf. columbiensis</i> | cephalic limbs, diverticulae and gut              | *** | SI         | 6.6 | 13.3 |
| Marble Canyon MCC1 | 14-882  | 64997 | ab | -363 | peronopsid                         | dark tissue under pygidial axis                   | *   |            | 0.9 | 1.9  |
| Marble Canyon MCC1 | 14-930  | 64998 | b  | -376 | <i>Peronopsis cf. columbiensis</i> | cephalic tissue?                                  |     |            |     |      |
| Marble Canyon MCC1 | 14-972  | 64999 | ab | -388 | <i>Peronopsis cf. columbiensis</i> | limb                                              | **  |            | 5.6 | 12.3 |
| Marble Canyon MCC1 | 14-996  | 65000 | ab | -388 | <i>Peronopsis cf. columbiensis</i> | pygidial limb?; dark tissue under pygidium        | *   |            |     |      |
| Marble Canyon MCC1 | 16-1030 | 65001 | ab | -381 | <i>Peronopsis cf. columbiensis</i> | thoracic, cephalic limbs; gut; extruded gut stain | *** |            | 6.6 | 12.7 |
| Marble Canyon MCC1 | 16-777  | 65002 | ab | -242 | <i>Peronopsis cf. columbiensis</i> | gut; cephalic limbs?; cephalic diverticulae       | **  |            | 7.1 | 13.4 |

|                    |        |       |    |      |                                      |                                                   |     |    |     |      |
|--------------------|--------|-------|----|------|--------------------------------------|---------------------------------------------------|-----|----|-----|------|
| Marble Canyon MCC1 | 16-789 | 65003 | ab | -386 | <i>Peronopsis cf. columbiensis</i>   | gut                                               | *   |    | 5.3 | 10   |
| Marble Canyon MCC1 | 16-790 | 65004 | ab | -380 | <i>Peronopsis cf. columbiensis</i>   | gut?                                              |     |    |     |      |
| Marble Canyon MCC1 | 16-832 | 65005 | nc | -417 | <i>Peronopsis cf. columbiensis</i>   | cephalic diverticulae?                            | *   |    | 5.7 |      |
| Marble Canyon MCC1 | 16-841 | 65006 | a  | -395 | <i>Peronopsis cf. columbiensis</i>   | gut                                               | *   |    |     |      |
| Marble Canyon MCC1 | 16-845 | 65007 | ab | -416 | <i>Peronopsis cf. columbiensis</i>   | cephalic tissue?                                  |     |    |     |      |
| Marble Canyon MCC1 | 16-873 | 65008 | ab | -496 | <i>Ptychagnostus cf. praecurrens</i> | limb traces                                       | *   |    | 4.3 | 9.3  |
| Marble Canyon MCC1 | 16-905 | 65009 | nc | -496 | <i>Peronopsis cf. columbiensis</i>   | ?                                                 |     |    | 4.7 | 9.7  |
| Marble Canyon MCC1 | 16-926 | 65010 | nc | -515 | <i>Ptychagnostus cf. praecurrens</i> | cephalic and trunk limbs                          | *** | SI |     | 9.6  |
| Marble Canyon MCC1 | 16-935 | 65011 | nc | -382 | <i>Itagnostus?</i>                   | cephalic limbs? (poorly preserved)                |     |    |     |      |
| Marble Canyon MCC1 | 16-938 | 65012 | nc | -485 | <i>Peronopsis cf. columbiensis</i>   | cephalic limbs? (poorly preserved)                |     |    | 5.7 | 12.9 |
| Marble Canyon MCC1 | 16-947 | 65013 | ab | -500 | <i>Ptychagnostus cf. praecurrens</i> | limb with clubs sticking out on enrolled specimen | *   |    |     |      |

|                    |         |       |    |      |                                  |                                        |     |         |     |      |
|--------------------|---------|-------|----|------|----------------------------------|----------------------------------------|-----|---------|-----|------|
| Marble Canyon MCC1 | 16-951  | 65014 | ab | -448 | <i>Itagnostus?</i>               | cephalic limbs                         |     |         |     | 9.3  |
| Marble Canyon MCC1 | 16-951  | 65014 | b  | -448 | peronopsid                       | cephalic limbs                         | **  |         |     |      |
| Marble Canyon MCC1 | 16-959  | 65015 | ab | -480 | peronopsid                       | dark cephalic tissue?                  |     |         |     |      |
| Walcott Quarry BW  | 94-1852 | 65016 | ab | -110 | <i>Ptychagnostus praecurrens</i> | cephalic limbs                         | *   |         | 3.8 | 8.1  |
| Walcott Quarry BW  | 94-2256 | 65017 | ab | -130 | <i>Ptychagnostus praecurrens</i> | cephalic limbs                         | *** | Fig. 2A | 3.7 | 8.1  |
| Walcott Quarry BW  | 98-1910 | 65018 | ab | -235 | <i>Ptychagnostus praecurrens</i> | antennule                              |     |         |     |      |
| Walcott Quarry BW  | 98-2374 | 65019 | ab | -235 | <i>Ptychagnostus praecurrens</i> | limbs, poorly preserved                |     |         |     |      |
| Walcott Quarry BW  | 98-438  | 65020 | ab | -170 | <i>Ptychagnostus praecurrens</i> | ?                                      |     |         | 3.8 | 7.1  |
| Walcott Quarry BW  | 98-477  | 65021 | ab | -170 | <i>Ptychagnostus praecurrens</i> | limbs?                                 |     |         |     | 8.1  |
| Walcott Quarry BW  | 98-706  | 65022 | ab | -210 | <i>Ptychagnostus praecurrens</i> | limbs                                  | *   |         |     | 7.2  |
| Walcott Quarry BW  | 98-821  | 65023 | ab | -210 | <i>Ptychagnostus praecurrens</i> | limbs?                                 |     |         | 5.1 | 10.9 |
| Walcott Quarry BW  | 98-881  | 65024 | ab | -150 | <i>Ptychagnostus praecurrens</i> | ?                                      |     |         | 4.5 | 9.6  |
| Walcott Quarry BW  | 98-895  | 65025 | ab | -210 | <i>Ptychagnostus praecurrens</i> | internal tissue?                       |     |         |     |      |
| Walcott Quarry BW  | 98-904  | 65026 | ab | -150 | <i>Ptychagnostus praecurrens</i> | ?                                      |     |         |     |      |
| Walcott Quarry WQ  | 94-1564 | 65027 | ab | 10   | <i>Ptychagnostus praecurrens</i> | cephalic and trunk limbs; diverticulae | **  | SI      |     | 7.7  |

## **References (in addition to those in main text)**

- Ahlberg, P. (1988). Ocular structures in an Ordovician agnostid trilobite. *Lethaia*, 21(2), 115-120.
- Babcock, L. E., Peng, S., & Ahlberg, P. (2017). Cambrian trilobite biostratigraphy and its role in developing an integrated history of the Earth system. *Lethaia*, 50(3), 381-399.
- Boxshall, G. A. (2004). The evolution of arthropod limbs. *Biological Reviews*, 79(2), 253-300.
- Briggs, D. E., Siveter, D. J., Siveter, D. J., Sutton, M. D., Garwood, R. J., & Legg, D. (2012). Silurian horseshoe crab illuminates the evolution of arthropod limbs. *Proceedings of the National Academy of Sciences*, 109(39), 15702-15705.
- Cederström, P., Ahlberg, P., Clarkson, E. N., Nilsson, C. H., & Axheimer, N. (2009). The lower Cambrian eodiscoid trilobite *Calodiscus lobatus* from Sweden: morphology, ontogeny and distribution. *Palaeontology*, 52(3), 491-539.
- Dai, T., & Zhang, X. (2013). Morphology and ontogeny of the eodiscoid trilobite *Sinodiscus changyangensis* from the lower Cambrian of South China. *Palaeontology*, 56(2), 411-420.
- Edgecombe, G. D., & Ramsköld, L. (1999). Relationships of Cambrian Arachnata and the systematic position of Trilobita. *Journal of Paleontology*, 73(2), 263-287.
- Haug, J. T., Waloszek, D., Haug, C., & Maas, A. (2010). High-level phylogenetic analysis using developmental sequences: The Cambrian† *Martinsonia elongata*, † *Musacaris gerdgeyeri* gen. et sp. nov. and their position in early crustacean evolution. *Arthropod Structure & Development*, 39(2-3), 154-173.
- Hughes, N. C., Minelli, A., & Fusco, G. (2006). The ontogeny of trilobite segmentation: a comparative approach. *Paleobiology*, 32(4), 602-627.
- Jell, P.A. (1975). Australian Middle Cambrian Eodiscoids with a review of the superfamily. *Palaeontographica Abteilung A*. 150, 1-97.
- Lamsdell, J. C. (2013). Revised systematics of Palaeozoic 'horseshoe crabs' and the myth of monophyletic Xiphosura. *Zoological Journal of the Linnean Society*, 167(1), 1-27.
- Lamsdell, J. C., Stein, M., & Selden, P. A. (2013). *Kodymirus* and the case for convergence of raptorial appendages in Cambrian arthropods. *Naturwissenschaften*, 100(9), 811-825.
- Minter, N. J., Mángano, M. G., & Caron, J. B. (2012). Skimming the surface with Burgess Shale arthropod locomotion. *Proc. R. Soc. B*, 279(1733), 1613-1620.
- Moore, R. A., Briggs, D. E., & Bartels, C. (2008). The arthropod *Bundenbachiellus giganteus* from the Lower Devonian Hunsrück Slate, Germany. *Paläontologische Zeitschrift*, 82(1), 31-39.
- Naimark, E. B. (2007). Comparative ontogeny of different species of agnostina. *Paleontological Journal*, 41(1), 69-78.
- Ortega-Hernández, J. (2015). Homology of head sclerites in Burgess Shale euarthropods. *Current Biology*, 25(12), 1625-1631.

- Ortega-Hernández, J. (2016). Making sense of 'lower' and 'upper' stem-group Euarthropoda, with comments on the strict use of the name Arthropoda von Siebold, 1848. *Biological Reviews*, 91(1), 255-273.
- Ortega-Hernández, J., & Brena, C. (2012). Ancestral patterning of tergite formation in a centipede suggests derived mode of trunk segmentation in trilobites. *PLoS One*, 7(12), e52623.
- Ortega-Hernández, J., Janssen, R., & Budd, G. E. (2017). Origin and evolution of the panarthropod head—A palaeobiological and developmental perspective. *Arthropod structure & development*, 46(3), 354-379.
- Stürmer, W., & Bergström, J. (1978). The arthropod *Cheloniellon* from the Devonian Hunsrück Shale. *Paläontologische Zeitschrift*, 52(1-2), 57-81.
- Sutton, M. D., Briggs, D. E., Siveter, D. J., Siveter, D. J., & Orr, P. J. (2002). The arthropod *Offacolus kingi* (Chelicerata) from the Silurian of Herefordshire, England: computer based morphological reconstructions and phylogenetic affinities. *Proceedings of the Royal Society of London B: Biological Sciences*, 269(1497), 1195-1203.
- Waloszek, D., Maas, A., Chen, J., & Stein, M. (2007). Evolution of cephalic feeding structures and the phylogeny of Arthropoda. *Palaeogeography, Palaeoclimatology, Palaeoecology*, 254(1-2), 273-287.
- Whittington, H. B. (1971). Redescription of *Marrella splendens* (Trilobitoidea) from the Burgess Shale, Middle Cambrian, British Columbia. *Geological Survey of Canada, Bulletin*, 209, 1-24.
